# Supplementary material for: Phytate-coordinated nickel foam with enriched NiOOH intermediates for 5-hydroxymethylfurfural electrooxidation
Source: Royal Society of Chemistry journal article supplement (doi:10.1039/d2cc02182j), 2022-01-01
Supplement: d2cc02182j1.pdf [file d2cc02182j1.pdf]

## Supporting Information

### Phytate-coordinated nickel foam with enriched NiOOH intermediates for 5-hydroxymethylfurfural electrooxidation

Wangyan Gou,<sup>a#</sup> Yimin Chen,<sup>b#</sup> Yifei Zhong,<sup>c</sup> Qingyu Xue<sup>a</sup>, Jiayuan Li<sup>a\*</sup> and Yuanyuan Ma<sup>a\*</sup>

a Dr. W. Gou, Prof. J. Li, Q. Xue, Prof. Y. Ma,  
Key Laboratory of Special Functional and Smart Polymer Materials of Ministry of Industry  
and Information Technology, School of Chemistry and Chemical Engineering  
Northwestern Polytechnical University  
Xi'an 710072 (P. R. China)

b Y. Chen  
Institute for Frontier Materials  
Deakin University  
Geelong 3216 (Australia)

c Y. Zhong,  
School of Chemical Engineering and Technology  
Xi'an Jiaotong University  
Xi'an 710049 (P. R. China)

Correspondence and requests for materials should be addressed to Li J. Y. (Email: [jiayuanli@nwpu.edu.cn](mailto:jiayuanli@nwpu.edu.cn)); Ma Y. M. (Email: [yyma@nwpu.edu.cn](mailto:yyma@nwpu.edu.cn))

#### **This PDF file includes:**

Experimental section  
Supplementary Figs. 1-16 and Tables 1-3  
Supplementary References

## Experimental Section

### Materials preparation

**Chemicals.** Hydrochloric acid (HCl, 36.0-38.0 %), acetone (CH<sub>3</sub>OCH<sub>3</sub>) and ethanol (CH<sub>3</sub>CH<sub>2</sub>OH) were purchased from Sinopharm Chemical Reagent Co., Ltd. Phytic acid, potassium hydroxide (KOH) 5-hydroxymethylfurfural (HMF), 2,5-furandicarboxylic acid (FDCA), 5-hydroxymethyl-2-furan-carboxylic acid (HMFCFA), 2,5-diformylfuran (DFF), 2-formyl-5-furancarboxylic acid (FFCA) were obtained from Energy Chemical. Nickel foam (NF) was purchased from Anping Huiruisi Network Co., Ltd. Deionized water with 18.2 MΩ·cm<sup>-1</sup> resistance was supplied by a water purification system. All the chemicals were used without further purification.

**Synthesis of PA-NF.** Firstly, A piece of commercially supplied NF (2×1×0.1 cm<sup>3</sup>) was firstly immersed into 1.0 M HCl solution for 15 min and washed with acetone and ethanol to remove surface impurities and oxides. A piece of NF was dipped in the 70 mL aqueous solution containing 3 mL PA for 10 min. Then, the solution was transferred into a 100 mL Teflon-lined stainless-steel autoclave and maintained at 120 °C for 6 h. The as-synthesized electrode was rinsed with water several times, dried at 60 °C in vacuum for 8 h ready for use.

### Composition and structure characterization

XRD measurements were conducted on Ultima IV with Cu Kα radiation ( $\lambda = 0.1541$  nm) from 10° to 90° at 40 kV and 40 mA. The morphology and EDX mapping of samples were analyzed by a ZEISS MERLIN Compact and Oxford x-max operated at an acceleration voltage of 30.0 kV. FT-IR (Thermo Scientific Nicolet iS5) was used to measure the functional group of PA on the NF surface. XPS was measured using a Thermo Scientific K-Alpha equipped with Al Kα monochromatized radiation at 1486.6 eV X-ray source. All binding energies were referenced to the C 1s peak (284.8 eV) arising from the adventitious carbon-containing species. Raman spectra were acquired on an INVIAREFLEX Raman Spectrophotometer with an exciting wavelength of 532 nm. Ni loss was analyzed using a PerkinElmer Optima 2100 DV Inductively coupled plasma mass spectrometer (ICP-MS).

## Electrochemical measurements

Electrochemical experiments were conducted on a CHI-760E Electrochemical Workstation (CHI Instruments) typically consisting of a standard three-electrode system. All electrochemical investigations were performed at room temperature using an Ag/AgCl as reference electrode, a graphite rod as counter electrode, and a piece of PA-NF or bare NF served as working electrode, respectively. A 50 mL 1.0 M KOH solution with or without HMF was employed. The measured potentials versus the reversible hydrogen electrode (RHE) were calculated according to Equation (1):

$$E_{RHE} = E_{Ag/AgCl} + 0.197 + 0.059 \times pH \quad (1)$$

All electrochemical reaction was carried out at room temperature ( $25 \pm 1$  °C), and the electrolyte was stirred at 800 rpm with a magnetic stir bar. CV measurements were performed at a scan rate of  $5 \text{ mV}\cdot\text{s}^{-1}$ . Operando electrochemical impedance spectroscopy (EIS) tests were performed at different applied potentials versus RHE in the frequency range of 0.01-100k Hz by using Autolab PGSTAT302N.

## Product analysis

HMF and oxidation products were quantitatively obtained by a HPLC (Waters 1525) equipped with an ultraviolet-visible detector (265 nm) and a 4.6 mm×150 mm Shim-pack GWS 5  $\mu\text{m}$  C 18 column. The mobile phase was HPLC grade methanol and ammonium formate aqueous solution (5 mM, 3:7, flow rate is  $0.6 \text{ ml}\cdot\text{min}^{-1}$ ). Specifically, 10  $\mu\text{L}$  of electrolyte was removed during potentiostatic electrolysis and diluted to 0.99 ml with ultrapure water. The conversion (%), faradaic efficiency (FE), and yield (%) were calculated based on the Equations (2), (3), and (4), respectively:

$$\text{Conv. (\%)} = \frac{n(\text{HMF consumed})}{n(\text{HMF initial})} \times 100 \quad (2)$$

$$\text{Yield. (\%)} = \frac{n(\text{products formed})}{n(\text{HMF initial})} \times 100 \quad (3)$$

$$\text{FE (\%)} = \frac{n(\text{FDCA formed})}{\text{charge}/(6F)} \times 100 \quad (4)$$

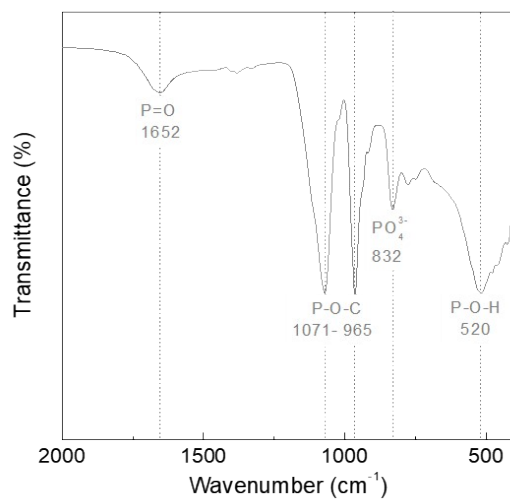

**Fig. S1.** FT-IR spectrum of phytic acid.

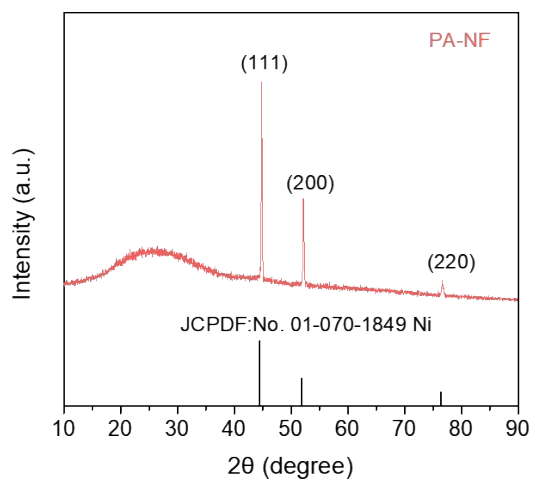

**Fig. S2.** XRD spectrum of PA-NF.

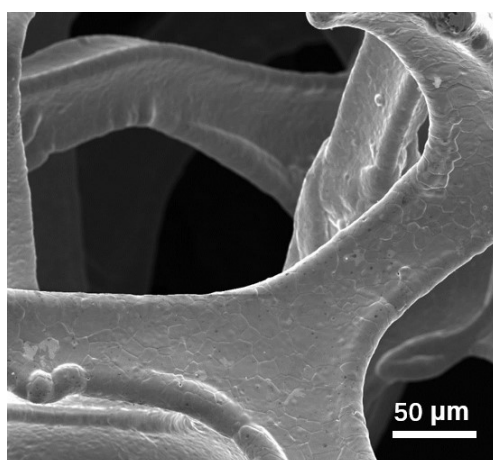

**Fig. S3.** Low-magnification SEM image of NF.

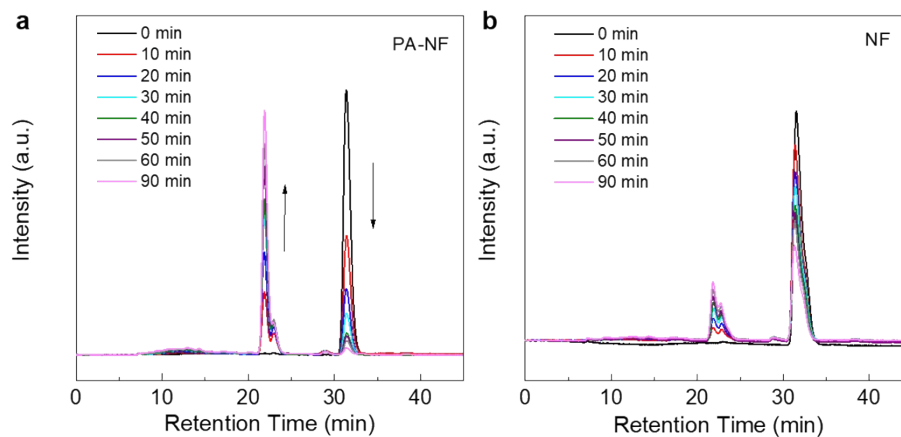

**Fig. S4.** High performance liquid chromatography analysis results of (a) PA-NF and (b) NF.

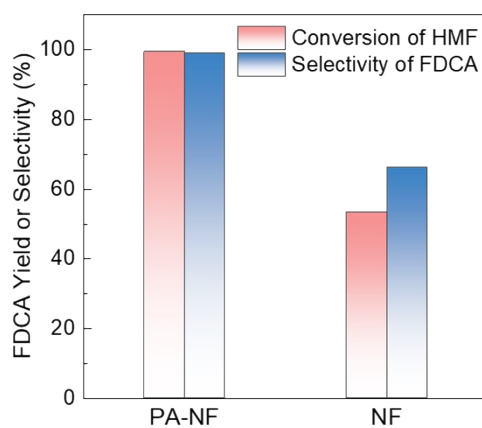

**Fig. S5.** Conversion of HMF and selectivity of FDCA of PA-NF and NF at 1.40  $V_{RHE}$ .

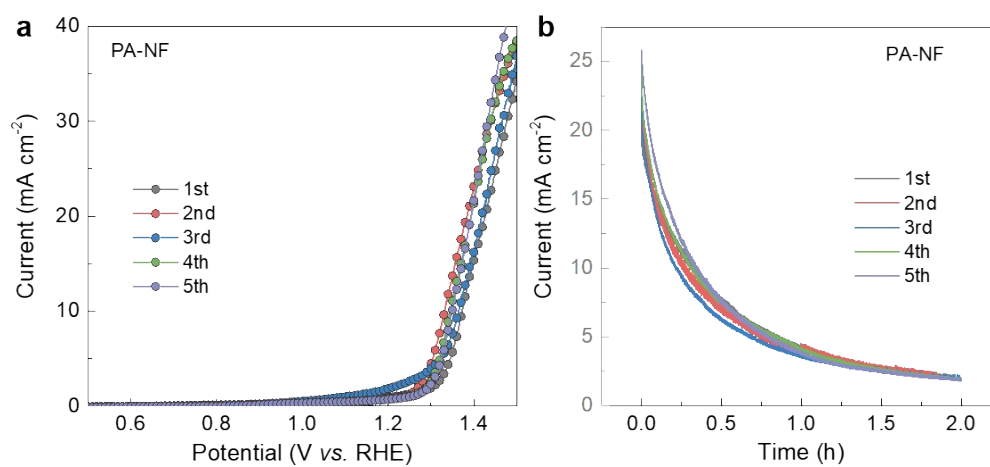

**Fig. S6.** (a) LSV curves and (b) chronoamperometry curves of PA-NF during five successive reuse cycles.

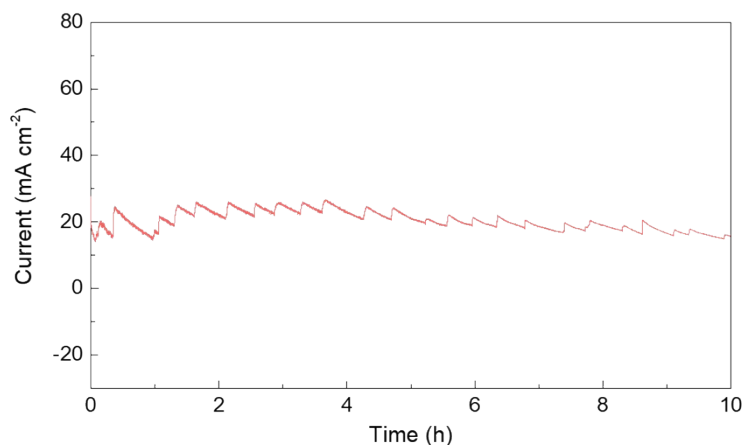

**Fig. S7.** Catalytic durability over the PA-NF electrode at a constant potential of 1.4 V vs. RHE with continuous supply of HMF.

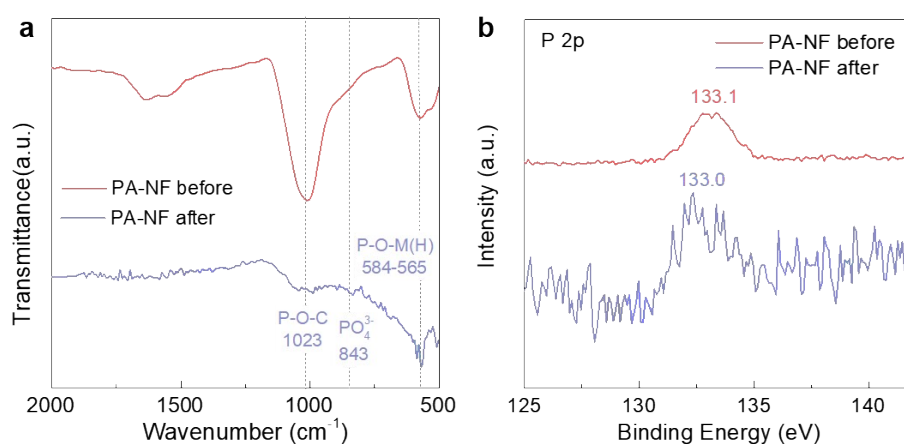

**Fig. S8.** (a) FT-IR spectra and (b) XPS P 2p spectra of PA-NF before and after HMF electrooxidation, respectively.

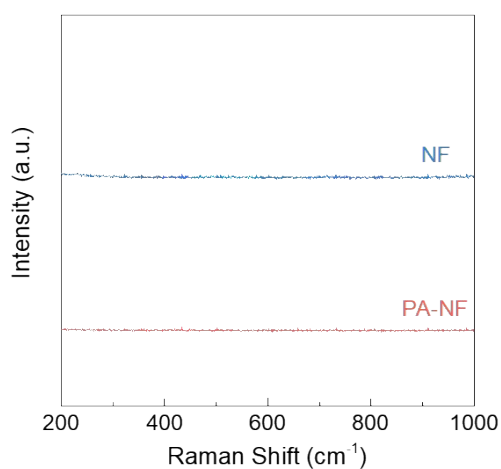

**Fig. S9.** Raman spectra of PA-NF and NF when HMF were existed in electrolyte.

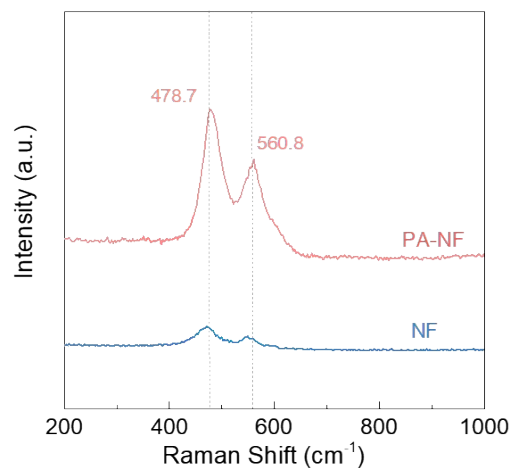

**Fig. S10.** Raman spectra of PA-NF and NF when HMF were used up in electrolyte.

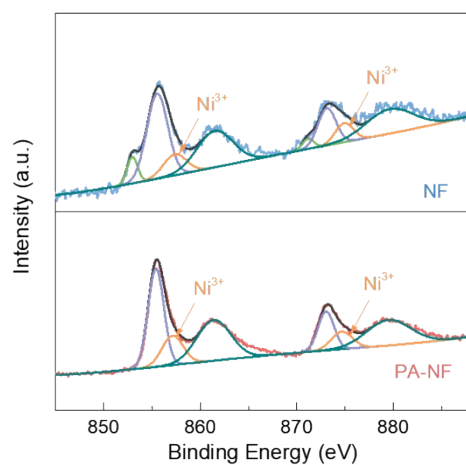

**Fig. S11.** High-resolution XPS spectra of Ni 2p of PA-NF and NF after HMF electrooxidation reaction.

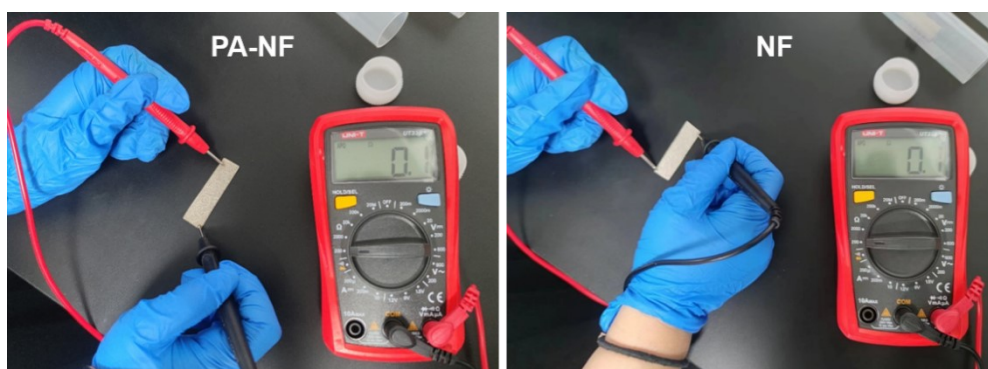

**Fig. S12.** Conductivity investigations on the PA-NF and NF electrodes.

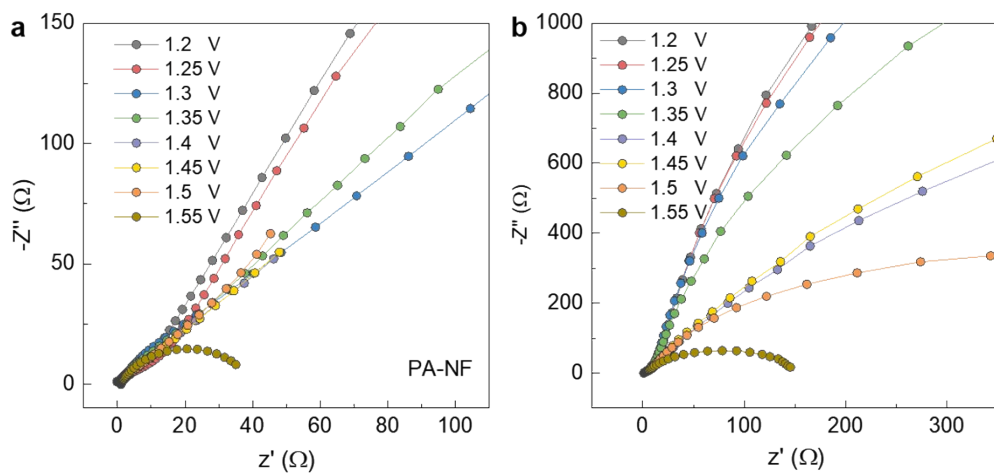

**Fig. S13.** Nyquist plots of (a) PA-NF and (b) NF electrodes at various potentials in 1 M KOH.

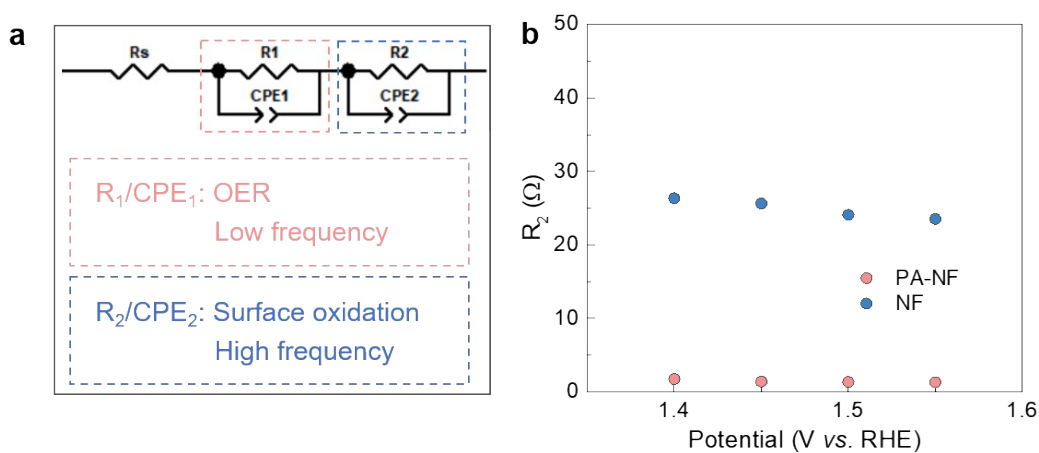

**Fig. S14.** (a) Equivalent circuit model for Nyquist plots of PA-NF and NF. (b) The fitted  $R_2$  change of PA-NF and NF with applied potential.

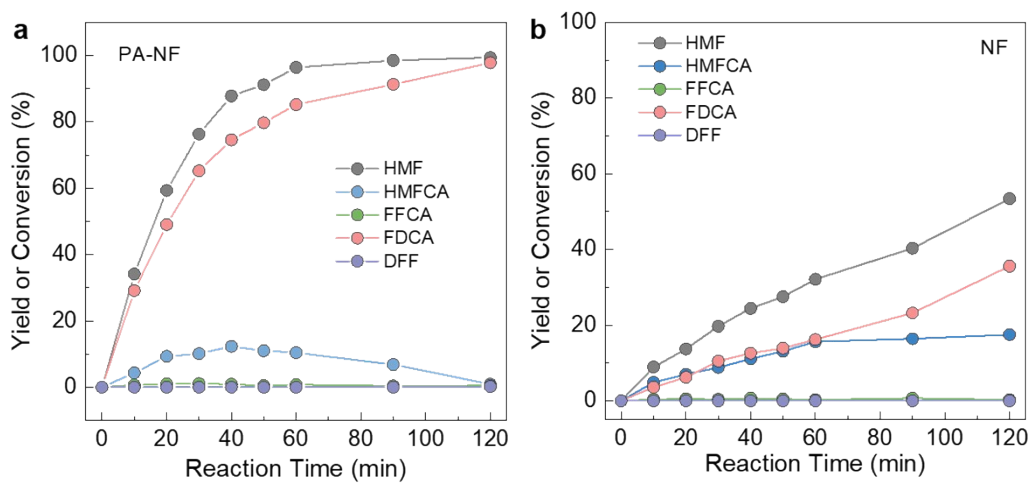

**Fig. S15.** Conversion of HMF and yield of its oxidation products of (a) PA-NF and (b) NF against reaction time at  $1.40 V_{RHE}$ .



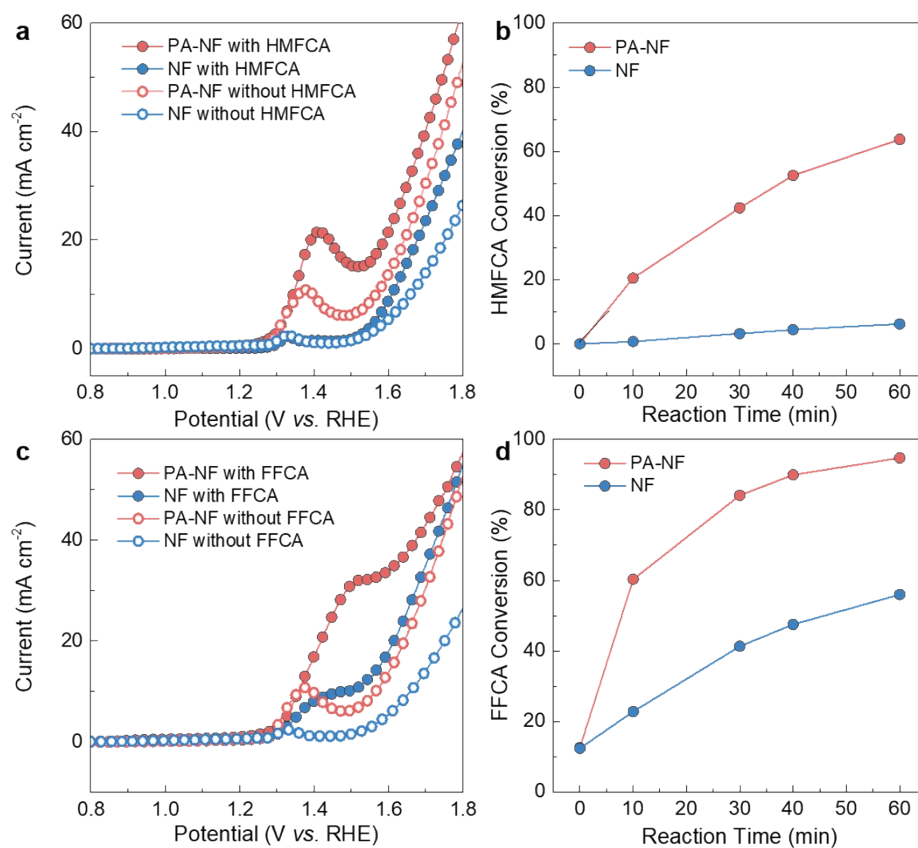

**Fig. S16.** (a) LSV curves of PA-NF and NF with and without 10 mM HMFCa at a scan rate of 10 mV·s<sup>-1</sup>. (b) Conversion of HMFCa for PA-NF and NF against reaction time at 1.40 V<sub>RHE</sub>. (c) LSV curves of PA-NF and NF with and without 10 mM FFCA at a scan rate of 10 mV·s<sup>-1</sup>. (d) Conversion of FFCA for PA-NF and NF against reaction time at 1.40 V<sub>RHE</sub>.

**Table S1.** Comparison of HMF electrooxidation performance with other non-noble metal catalysts.

| Catalyst                                              | Required potential at 20 mA/cm <sup>2</sup> (V vs. RHE) | Conversion of HMF (%) | Selectivity of FDCA (%) | Reaction time (h) | HMF oxidation rate (mmol/h) | Ref.             |
|-------------------------------------------------------|---------------------------------------------------------|-----------------------|-------------------------|-------------------|-----------------------------|------------------|
| <b>PA-NF</b>                                          | <b>1.40</b>                                             | <b>99.4</b>           | <b>98.9%</b>            | <b>2</b>          | <b>0.76</b>                 | <b>This work</b> |
| NiCoBDC-NF                                            | 1.60                                                    | 88.0                  | 99%                     | 6                 | 0.053                       | Ref. 1           |
| NiCo <sub>2</sub> O <sub>4</sub>                      | >1.60                                                   | 99.6                  | 90.8%                   | 0.9               | -                           | Ref. 2           |
| CuNi(OH) <sub>2</sub> /C                              | 1.75                                                    | >99.9                 | 93.0%                   | 5                 | 0.03                        | Ref. 3           |
| NiCoFe LDH                                            | 1.51                                                    | >99.9                 | 84.9%                   | 4                 | 0.32                        | Ref. 4           |
| Ni(NS)/CC                                             | 1.47                                                    | 99.7                  | >99.0%                  | 1                 | 0.2                         | Ref. 5           |
| Pt/Ni(OH) <sub>2</sub>                                | 1.42                                                    | >99.9                 | 98.7%                   | -                 | -                           | Ref. 6           |
| Ni(OH) <sub>2</sub> /NF                               | 1.33                                                    | >99.9                 | 96.0%                   | 1.5               | 0.35                        | Ref. 7           |
| Ni <sub>0.9</sub> Cu <sub>0.1</sub> (OH) <sub>2</sub> | 1.65                                                    | 99.7                  | 84%                     | 1.5               | -                           | Ref. 8           |
| N-NiMoO <sub>4</sub>                                  | 1.43                                                    | 99.2                  | 97.4%                   | 2                 | 0.14                        | Ref. 9           |
| NiS <sub>x</sub> /Ni <sub>2</sub> P                   | 1.346                                                   | >99.9                 | 98.5%                   | 2.8               | 0.16                        | Ref. 10          |
| Ni <sub>x</sub> B-modified                            | 1.42                                                    | >99.9                 | 98.5%                   | 0.5               | 0.27                        | Ref. 11          |
| om-Co <sub>3</sub> O <sub>4</sub>                     | 1.45                                                    | >99.9                 | 99.8%                   | -                 | -                           | Ref. 12          |
| CoO-CoSe                                              | 1.38                                                    | >99.9                 | 99.0%                   | 1                 | -                           | Ref. 13          |
| MoO <sub>2</sub> /FeP                                 | 1.38                                                    | 9.49                  | 98.6%                   | 2.7               | 0.074                       | Ref. 14          |

**Table S2.** The ICP-MS results of PA-NF after HMF electrooxidation reaction at 1.40  $V_{\text{RHE}}$ .

| Total electrolyte volume (mL) | Electrolyte volume for ICP-MS (mL) | Measured metal content (ppb) | Mass of leached metal in electrolyte ( $\mu\text{g}$ ) | Mass of PA-NF (mg) | Ni Loss (%) |
|-------------------------------|------------------------------------|------------------------------|--------------------------------------------------------|--------------------|-------------|
| 50                            | 4                                  | 2.9                          | 0.145                                                  | 56.4               | 0.00026     |

**Table S3.** The fitted parameters of the EIS datas of NF and PA-NF in 1M KOH.

| Catalyst | Potential (V vs. RHE) | $R_s$ ( $\Omega$ ) | $n_1$ | $R_1$ ( $\Omega$ ) | $C_{\phi 1}$ (mF) | $n_2$ | $R_2$ ( $\Omega$ ) | $C_{\phi 2}$ (mF) |
|----------|-----------------------|--------------------|-------|--------------------|-------------------|-------|--------------------|-------------------|
| PA-NF    | 1.2                   | 0.93               | 0.75  | 12375              | 1.6               | 0.81  | 32.7               | 1.6               |
|          | 1.25                  | 0.93               | 0.73  | 9538               | 9.6               | 0.83  | 26.6               | 3.7               |
|          | 1.3                   | 0.93               | 0.73  | 7525               | 35.9              | 0.83  | 15.9               | 9.6               |
|          | 1.35                  | 0.93               | 0.72  | 4529               | 61.7              | 0.81  | 9.83               | 31.7              |
|          | 1.4                   | 0.93               | 0.72  | 3717               | 206.0             | 0.80  | 1.74               | 138.0             |
|          | 1.45                  | 0.93               | 0.77  | 348                | 264.9             | 0.81  | 1.40               | 140.0             |
|          | 1.5                   | 0.93               | 0.76  | 155                | 354.9             | 0.81  | 1.34               | 140.0             |
|          | 1.55                  | 0.93               | 0.81  | 38                 | 384.7             | 0.81  | 1.31               | 141.1             |
| NF       | 1.2                   | 0.96               | 0.95  | 25585              | 8.0               | 0.82  | 33.8               | 2.4               |
|          | 1.25                  | 0.96               | 0.96  | 19610              | 8.8               | 0.86  | 32.61              | 3.5               |
|          | 1.3                   | 0.96               | 0.98  | 12676              | 15.8              | 0.81  | 31.99              | 3.8               |
|          | 1.35                  | 0.96               | 0.96  | 7343               | 24.7              | 0.83  | 28.90              | 6.8               |
|          | 1.4                   | 0.96               | 0.91  | 3934               | 71.6              | 0.82  | 26.34              | 19.9              |
|          | 1.45                  | 0.96               | 0.85  | 3127               | 73.9              | 0.81  | 25.33              | 23.2              |
|          | 1.5                   | 0.96               | 0.84  | 865                | 81.0              | 0.81  | 24.10              | 23.8              |
|          | 1.55                  | 0.96               | 0.85  | 130                | 83.6              | 0.85  | 23.51              | 22.9              |

## References

- 1 M. Cai, Y. Zhang, Y. Zhao, Q. Liu, Y. Li and G. Li, *J. Mater. Chem. A*, 2020, **8**, 20386-20392.
- 2 M. J. Kang, H. Park, J. Jegal, S. Y. Hwang, Y. S. Kang and H. G. Cha, *Appl. Catal. B: Environ.*, 2019, **242**, 85-91.
- 3 H. Chen, J. Wang, Y. Yao, Z. Zhang, Z. Yang, J. Li, K. Chen, X. Lu, P. Ouyang and J. Fu, *ChemElectroChem*, 2019, **6**, 5797-5801.
- 4 M. Zhang, Y. Liu, B. Liu, Z. Chen, H. Xu and K. Yan, *ACS Catal.*, 2020, **10**, 5179-5189.
- 5 X. Lu, K. -H. Wu, B. Zhang, J. Chen, F. Li, B.-J. Su, P. Yan, J.-M. Chen and W. Qi, *Angew. Chem. Int. Ed.*, 2021, **60**, 14528-14535.
- 6 B. Zhou, Y. Li, Y. Zou, W. Chen, W. Zhou, M. Song, Y. Wu, Y. Lu, J. Liu, Y. Wang and S. Wang, *Angew. Chem. Int. Ed.*, 2021, **60**, 22908-22914.
- 7 J. Zhang, W. Gong, H. Yin, D. Wang, Y. Zhang, H. Zhang, G. Wang and H. Zhao, *ChemSusChem*, 2021, **14**, 2935-2942.
- 8 J. Zhang, P. Yu, G. Zeng, F. Bao, Y. Yuan and H. Huang, *J. Mater. Chem. A*, 2021, **9**, 9685-9691.
- 9 W. Wang and M. Wang, *Catal. Sci. Technol.*, 2021, **11**, 7326-7330.
- 10 B. Zhang, H. Fu and T. Mu, *Green Chem.*, 2022, **24**, 877-884.
- 11 S. Barwe, J. Weidner, S. Cychy, D. M. Morales, S. Dieckhöfer, D. Hiltrop, J. Masa, M. Muhler and W. Schuhmann, *Angew. Chem. Int. Ed.*, 2021, **60**, 20535-20542.
- 12 C. Wang, H. -J. Bongard, M. Yu and F. Schüth, *ChemSusChem*, 2021, **14**, 1-9.
- 13 X. Huang, J. Song, M. Hua, Z. Xie, S. Liu, T. Wu, G. Yang and B. Han, *Green Chem.*, 2020, **22**, 843-849.
- 14 G. Yang, Y. Jiao, H. Yan, Y. Xie, A. Wu, X. Dong, D. Guo, C. Tian and H. Fu, *Adv. Mater.*, 2020, **32**, 2000455.
